# Supplementary material for: Transcranial direct current stimulation over the right DLPFC selectively modulates subprocesses in working memory
Source: PeerJ. 2018 May 28;6:e4906. doi: 10.7717/peerj.4906 (PMC5978386; doi:10.7717/peerj.4906)
Supplement: Supplemental Information 1 [file peerj-06-4906-s001.xlsx]

## Sheet: Sheet1
Subjects			Pre-stimulation effects								tDCS effects
			Accuracy				Reation Time				Accuracy				Reation Time
			0-back	1-back	2-back		0-back	1-back	2-back		0-back	1-back	2-back		0-back	1-back	2-back
1	Anodal	Easy	1	0.857143	0.666667		512.704	680.964	1246.19		0.964286	0.821429	0.714286		441.143	656.714	1118
2			0.964286	0.928571	0.714286		552.536	611.143	836.821		1	1	0.678571		456.679	518.036	590.036
3			0.892857	0.857143	0.88		550.143	659.964	1149.4		0.857143	0.964286	0.928571		563.75	695.893	733.357
4			1	0.925926	0.730769		786.731	1249.85	1452.5		0.928571	0.821429	0.714286		833.893	862.393	883.5
5			0.892857	0.892857	0.785714		410.714	468.321	581.214		1	0.928571	0.785714		369.964	476.786	538.929
6			0.964286	0.964286	0.857143		595.321	675.214	921.571		1	0.964286	0.892857		639.714	565.786	894.571
7			0.92	0.884615	0.925926		566.44	584.538	963.037		0.962963	0.785714	1		484.556	464.036	614.407
8			1	0.785714	0.892857		985.963	939.857	919.714		0.761905	0.821429	0.821429		659.905	758.964	684.25
9			1	1	1		567.963	581.741	640.643		0.964286	0.928571	0.964286		523.679	604.214	551.679
10			0.964286	0.928571	0.925926		646.964	702.607	948.259		0.964286	0.964286	0.964286		548.75	591.179	751.643
1		Difficult	0.925926	0.892857	0.678571		833.296	982.321	1541.64		0.892857	0.821429	0.607143		886.321	1040.68	1679.18
2			0.96	0.888889	0.72		719.6	733	802.84		0.888889	0.814815	0.703704		567	610.815	592.667
3			0.62963	0.592593	0.428571		875.222	1063.33	1043.25		0.653846	0.518519	0.37037		726.615	737.111	810.259
4			0.809524	0.892857	0.821429		934.048	1186.71	1532.57		0.892857	0.892857	0.821429		995.321	1034.07	1089.89
5			0.703704	0.740741	0.785714		555.407	555.926	605.857		0.464286	0.75	0.5		441.143	573.357	567.571
6			0.96	0.851852	0.666667		709.32	941.963	1113.89		0.928571	0.892857	0.642857		701.393	865.214	918.214
7			0.888889	0.777778	0.857143		757.704	868.963	994.571		0.851852	0.814815	0.785714		604.63	679.481	840.107
8			0.75	0.75	0.714286		871.107	956.036	880.821		0.857143	0.535714	0.5		786.214	767.536	784.107
9			0.961538	0.884615	0.857143		717.115	705.115	888.643		0.964286	0.892857	0.857143		577.75	639.107	787.464
10			0.964286	0.928571	0.821429		695.214	1019.29	943.071		0.962963	0.892857	0.814815		671.926	839.393	733.148
11	Cathodal	Easy	1	1	0.892857		709.393	672.607	895.821		0.892857	1	0.75		841	846.5	1112.82
12			1	0.928571	0.928571		448.071	663.536	1561.64		0.964286	0.964286	0.928571		467.536	561.107	1363.75
13			0.961538	0.884615	0.923077		615.346	751.769	770.385		0.928571	0.928571	0.928571		637.75	648.036	690.286
14			0.923077	1	0.925926		630.654	644.571	762.519		0.964286	1	0.857143		608.143	683.107	852.5
15			1	0.892857	0.928571		599.357	721.357	1029.21		0.962963	0.925926	0.928571		579.704	604.074	724.857
16			0.961538	0.75	0.925926		631.615	707.643	781.407		1	0.892857	0.892857		419.357	604	650
17			1	0.964286	0.892857		569.25	619.929	1357.89		1	0.964286	1		559.481	829.714	1026.07
18			0.928571	0.892857	0.821429		776.179	805.607	1036.64		0.964286	0.857143	0.892857		529.679	632.714	691.393
19			0.928571	0.928571	0.892857		673.036	773	975.607		0.962963	0.928571	0.964286		549.185	701.429	683.036
11		Difficult	0.814815	0.714286	0.642857		853.556	942.75	970.643		0.857143	0.571429	0.714286		928.893	935.893	1199.07
12			1	0.892857	0.714286		744.964	1015.54	1629.93		0.964286	0.857143	0.785714		652.571	893.286	1513.29
13			0.928571	0.928571	0.821429		796.964	806.857	892.857		1	0.857143	0.892857		706.286	882.5	952.821
14			0.928571	0.821429	0.75		820.214	895.607	959.893		0.892857	0.928571	0.928571		864.786	1007.39	947.5
15			1	0.928571	0.75		735.321	793.929	1301.82		0.964286	0.892857	0.857143		759.25	806.536	1137.64
16			0.5	0.714286	0.571429		907.786	823.036	981.357		0.75	0.714286	0.666667		777.679	841.75	857.524
17			0.888889	0.928571	0.821429		741.667	916.5	1189.39		1	0.928571	0.964286		835.143	902	942.679
18			0.821429	0.607143	0.535714		667.607	823.429	925.857		0.821429	0.740741	0.714286		785.893	767.741	823.214
19			0.961538	0.821429	0.714286		986.231	963.107	1091.21		0.964286	0.821429	0.857143		849.393	817.179	1009.29
20	Sham	Easy	0.814815	1	0.928571		681.704	707.429	946.893		0.964286	0.928571	0.892857		581.429	625.643	654.964
21			0.8214	0.8571	0.75		701.071	990.554	846.786		0.928571	0.964286	0.892857		541.5	693.214	826.179
22			0.961538	0.807692	0.888889		568.846	681.885	673.296		0.964286	0.964286	0.964286		622.893	572.893	678
23			1	0.892857	0.928571		749.179	770.143	701.75		0.75	0.714286	0.714286		538.036	644.929	794.071
24			0.888889	0.857143	0.821429		802.37	835.357	1298.25		0.925926	0.857143	0.821429		823.407	966	1014.89
25			1	0.928571	0.928571		716.714	890.321	947		1	0.964286	1		631.714	647.321	719.5
26			0.928571	0.785714	0.642857		820.75	728.07	1231.75		0.857143	0.892857	0.785714		665.75	615.18	1351.71
27			0.714286	0.607143	0.571429		649.5	608.14	822.86		0.892857	0.821429	0.75		467.21	473.39	627.5
28			0.928571	0.964286	0.928571		584.964	689.214	746.857		0.964286	1	0.964286		526.607	531.893	921.143
29			0.428571	0.5	0.538462		795.321	863.11	891.35		0.928571	0.678571	0.607143		639.5	671.54	757.96
20		Difficult	0.785714	0.857143	0.607143		831.393	858.714	767.464		0.777778	0.814815	0.678571		802.926	884.407	797.643
21			0.7451	0.8889	0.6909		903.222	1201.45	1159.64		0.821429	0.892857	0.785714		764.893	789.036	1033.71
22			0.964286	0.928571	0.857143		643.357	813.821	988.607		0.961538	0.928571	0.821429		686.5	817.714	1104.57
23			0.857143	0.678571	0.607143		894.821	880.536	1024.64		0.785714	0.571429	0.642857		743.571	717.643	958.893
24			0.785714	0.821429	0.678571		1024.46	1116.57	1155.21		0.857143	0.821429	0.785714		1139	1114.82	1242.29
25			1	0.892857	0.785714		833	833.393	1126.79		0.892857	0.857143	0.75		1060.21	1014.68	1259.25
26			1	0.928571	0.851852		738.21	829.75	1028.26		0.821429	0.714286	0.607143		788.18	844.07	1211.96
27			0.821	0.946	0.75		576.32	497.82	617.46		0.821	0.75	0.821		595.36	658.54	803.39
28			0.714286	0.821429	0.714286		860	873.392	1135.46		0.75	0.892857	0.892857		856.321	860.036	884.393
29			0.857143	0.714286	0.571429		674.46	906.68	1289.64		0.714286	0.75	0.607143		681.36	760.64	861.21
